# Supplementary material for: Consistency Between Lower Limb Preference and Dominance in Healthy Adult Distance Runners: Exploring its Variability Across Tasks and Time
Source: Research Square preprint supplement (doi:10.21203/rs.3.rs-8147618/v1), 2025-12-17
Supplement: Supplementary file 1 [file cf883099006cdaa3512cbfc1.docx]

**Table S1.** Absolute differences between the right and left leg for the novice runners (N = 24).

|  | **T1** | | | | **T2** | | | | **T3** | | | |
| --- | --- | --- | --- | --- | --- | --- | --- | --- | --- | --- | --- | --- |
|  | ***N*** | ***p-value*** | ***Z-value*** | ***r-value*** | ***N*** | ***p-value*** | ***Z-value*** | ***r-value*** | ***N*** | ***p-value*** | ***Z-value*** | ***r-value*** |
| **Range of motion test** |  |  |  |  |  |  |  |  |  |  |  |  |
| Ankle dorsiflexion range of motion | 24 | 0.100 | -1.645 | -0.336 | 22 | 0.188 | -1.315 | -0.280 | 19 | 0.825 | -0.221 | -0.051 |
| **Jump tests** |  |  |  |  |  |  |  |  |  |  |  |  |
| 5 repeated horizontal hop | 24 | 0.617 | -0.500 | -0.102 | 18 | 0.711 | -0.370 | -0.099 | 22 | 0.506 | -0.666 | -0.192 |
| 5 repeated vertical hop | 24 | 0.253 | -1.143 | -0.233 | 18 | 0.102 | -1.633 | -0.348 | 22 | 0.537 | -0.617 | -0.145 |
| **Strength tests** |  |  |  |  |  |  |  |  |  |  |  |  |
| Side bridge endurance | 24 | 0.466 | -0.729 | -0.149 | 22 | 0.592 | -0.536 | -0.114 | 19 | 0.546 | -0.604 | -0.139 |
| Ankle plantar flexion | 15 | 0.198 | -1.287 | -0.332 | 14 | **0.048** | -1.977 | -0.422 | 12 | 1.000 | 0.000 | 0.229 |
| Ankle dorsiflexion | 24 | 0.103 | -1.629 | -0.332 | 22 | 0.237 | -1.182 | -0.252 | 18 | 0.906 | -0.118 | -0.027 |
| Knee flexion | 24 | 0.648 | -0.457 | -0.093 | 22 | 0.299 | -1.039 | -0.222 | 19 | 0.334 | -0.966 | -0.222 |
| Knee extension | 24 | 0.063 | -1.857 | -0.379 | 22 | 0.249 | -1.153 | -0.246 | 19 | **0.027** | -2.214 | -0.508 |
| Hip abduction | 24 | 0.989 | -0.014 | -0.003 | 22 | 0.626 | -0.487 | -0.104 | 19 | 0.456 | -0.745 | -0.171 |
| Hip adduction | 24 | 0.808 | -0.243 | -0.050 | 22 | 0.465 | -0.730 | -0.156 | 19 | 0.587 | -0.543 | -0.125 |
| Note: significantly differences (p < 0.05) between the dominant or preferred leg and the non-dominant or non-preferred leg | | | | | | | | | | | | |

**Table S2.** Absolute differences between the right and left leg for the intermediate runners (N = 21).

|  | **T1** | | | | **T2** | | | | **T3** | | | |
| --- | --- | --- | --- | --- | --- | --- | --- | --- | --- | --- | --- | --- |
|  | ***N*** | ***p-value*** | ***Z-value*** | ***r-value*** | ***N*** | ***p-value*** | ***Z-value*** | ***r-value*** | ***N*** | ***p-value*** | ***Z-value*** | ***r-value*** |
| **Range of motion test** |  |  |  |  |  |  |  |  |  |  |  |  |
| Ankle dorsiflexion range of motion | 21 | 0.322 | -0.990 | -0.216 | 19 | 0.314 | -1.007 | -0.231 | 15 | **0.005** | -2.815 | -0.727 |
| **Jump tests** |  |  |  |  |  |  |  |  |  |  |  |  |
| 5 repeated horizontal hop | 21 | 0.566 | -0.574 | -0.125 | 17 | 0.408 | -0.827 | -0.120 | 19 | 0.601 | -0.523 | -0.120 |
| 5 repeated vertical hop | 21 | 0.455 | -0.747 | -0.163 | 17 | 0.868 | -0.166 | -0.425 | 19 | 0.064 | -1.852 | -0.425 |
| **Strength tests** |  |  |  |  |  |  |  |  |  |  |  |  |
| Side bridge endurance | 21 | 0.715 | -0.365 | -0.080 | 19 | 0.520 | -0.644 | -0.148 | 15 | 0.281 | -1.079 | -0.279 |
| Ankle plantar flexion | 12 | 0.875 | -0.157 | -0.045 | 11 | **-**1.511 | -0.131 | -0.039 | 10 | 0.059 | -1.886 | -0.596 |
| Ankle dorsiflexion | 21 | 0.664 | -0.435 | -0.095 | 18 | 0.138 | -1.482 | -0.349 | 14 | 0.875 | -0.157 | -0.042 |
| Knee flexion | 21 | 0.135 | -1.495 | -0.326 | 19 | **0.031** | -2.153 | -0.494 | 17 | 0.149 | -1.444 | -0.350 |
| Knee extension | 21 | 0.144 | -1.460 | -0.319 | 19 | 0.398 | -0.845 | -0.194 | 17 | 0.113 | -1.586 | -0.385 |
| Hip abduction | 15 | **0.019** | -2.346 | -0.606 | 19 | 0.687 | -0.403 | -0.092 | 17 | 0.083 | -1.733 | -0.420 |
| Hip adduction | 21 | 0.639 | -0.469 | -0.102 | 19 | 0.387 | -0.865 | -0.198 | 17 | 0.850 | -0.189 | -0.046 |
| Note: significantly differences (p < 0.05) between the dominant or preferred leg and the non-dominant or non-preferred leg | | | | | | | | | | | | |

**Table S3.** Absolute differences between the right and left leg for the highly-trained runners (N = 23).

|  | **T1** | | | | **T2** | | | | **T3** | | | |
| --- | --- | --- | --- | --- | --- | --- | --- | --- | --- | --- | --- | --- |
|  | ***N*** | ***p-value*** | ***Z-value*** | ***r-value*** | ***N*** | ***p-value*** | ***Z-value*** | ***r-value*** | ***N*** | ***p-value*** | ***Z-value*** | ***r-value*** |
| **Range of motion test** |  |  |  |  |  |  |  |  |  |  |  |  |
| Ankle dorsiflexion range of motion | 23 | **0.031** | -2.156 | -0.450 | 19 | **0.024** | -2.257 | -0.518 | 14 | 0.363 | -0.909 | -0.243 |
| **Jump tests** |  |  |  |  |  |  |  |  |  |  |  |  |
| 5 repeated horizontal hop | 23 | 0.301 | -1.034 | -0.216 | 17 | 0.407 | -0.828 | -0.397 | 19 | 0.084 | -1.730 | -0.397 |
| 5 repeated vertical hop | 23 | **0.002** | -3.068 | -0.640 | 17 | 0.554 | -0.592 | -0.125 | 19 | 0.586 | -0.544 | -0.125 |
| **Strength tests** |  |  |  |  |  |  |  |  |  |  |  |  |
| Side bridge endurance | 23 | 0.083 | -1.734 | -0.362 | 19 | **0.014** | -2.455 | -0.563 | 14 | 0.778 | -0.282 | -0.0754 |
| Ankle plantar flexion | 15 | 0.088 | -1.704 | -0.440 | 12 | **0.005** | -2.824 | -0.815 | 12 | 0.099 | -1.647 | -0.475 |
| Ankle dorsiflexion | 23 | 0.697 | -0.390 | -0.081 | 19 | 0.117 | -1.569 | -0.360 | 17 | 0.955 | -0.057 | -0.014 |
| Knee flexion | 23 | 0.176 | -1.354 | -0.282 | 19 | 0.091 | -1.690 | -0.388 | 17 | **0.005** | -2.817 | -0.683 |
| Knee extension | 23 | **0.013** | -2.479 | -0.517 | 19 | 0.794 | -0.261 | -0.060 | 17 | 0.523 | -0.639 | -0.155 |
| Hip abduction | 23 | 0.242 | -1.171 | -0.244 | 19 | 0.560 | -0.584 | -0.134 | 17 | 0.550 | -1.138 | -0.276 |
| Hip adduction | 23 | 0.186 | -1.323 | -0.276 | 19 | 0.059 | -1.891 | -0.534 | 17 | 0.836 | -0.207 | -0.050 |
| Note: significantly differences (p < 0.05) between the dominant or preferred leg and the non-dominant or non-preferred leg | | | | | | | | | | | | |

**Table S4.** Kappa coefficients (κ) indicating the agreement between limb preference and limb dominance at each individual time point for the novice, intermediate and highly-trained runners

|  |  | **Novice runners** | | | **Intermediate runners** | | | **Highly-trained runners** | | |
| --- | --- | --- | --- | --- | --- | --- | --- | --- | --- | --- |
|  |  | T1 | T2 | T3 | T1 | T2 | T3 | T1 | T2 | T3 |
| **Range of motion test** | |  |  |  |  |  |  |  |  |  |
| Ankle dorsiflexion range of motion | N | 24 | 22 | 19 | 21 | 19 | 15 | 23 | 19 | 13 |
| κ | 0.408 | 0.411 | 0.257 | 0.387 | 0.568 | 0.333 | -0.236 | 0.367 | 0.366 |
| LoA | Mod. | Mod. | Fair | Fair | Mod. | Fair | Poor | Fair | Fair |
| **Jump-tests** |  |  |  |  |  |  |  |  |  |  |
| 5 repeated horizontal hop | N | 24 | 18 | 19 | 21 | 17 | 15 | 23 | 17 | 14 |
| Κ | 0.070 | -0.444 | -0.541 | 0.143 | -0.417 | -0.514 | -0.193 | -0.342 | -0.346 |
| LoA | Slight | Poor | Poor | Slight | Poor | Poor | Poor | Poor | Poor |
| 5 repeated vertical hop | N | 24 | 18 | 19 | 21 | 17 | 15 | 23 | 17 | 14 |
| κ | -0.255 | -0.416 | -0.033 | -0.050 | -0.041 | -0.341 | -0.061 | -0.360 | -0.346 |
| LoA | Poor | Poor | Poor | Poor | Poor | Poor | Poor | Poor | Poor |
| **Strength tests** |  |  |  |  |  |  |  |  |  |  |
| Side bridge endurance | N | 24 | 21 | 19 | 21 | 19 | 15 | 23 | 19 | 14 |
| κ | 0.250 | 0.432 | 0.136 | 0.054 | 0.394 | 0.000 | 0.319 | -0.148 | 0.553 |
| LoA | Fair | Mod. | Slight | Slight | Fair | Slight | Fair | Poor | Mod. |
| Ankle plantar flexion | N | 15 | 14 | 12 | 12 | 11 | 10 | 15 | 10 | 12 |
| κ | 0.151 | -0.143 | 0.167 | 0.118 | 0.068 | -0.250 | 0.412 | -0.200 | 0.167 |
| LoA | Slight | Poor | Slight | Slight | Slight | Poor | Mod. | Poor | Slight |
| Ankle dorsiflexion | N | 24 | 22 | 19 | 21 | 19 | 17 | 23 | 19 | 17 |
| κ | 0.000 | 0.076 | 0.174 | -0.065 | -0.131 | 0.212 | 0.167 | 0.197 | 0.354 |
| LoA | Slight | Slight | Slight | Poor | Poor | Fair | Slight | Slight | Fair |
| Knee flexion | N | 24 | 22 | 19 | 21 | 19 | 17 | 23 | 19 | 17 |
|  | κ | 0.229 | 0.052 | 0.305 | 0.200 | 0.759 | 0.029 | 0.389 | -0.070 | 0.209 |
|  | LoA | Fair | Slight | Fair | Fair | Subst. | Slight | Fair | Poor | Fair |
| Knee extension | N | 24 | 22 | 19 | 21 | 19 | 17 | 23 | 190.0 | 16 |
| κ | 0.000 | 0.092 | 0.095 | 0.394 | 0.165 | 0.092 | 0.311 | 0.045 | -0.085 |
| LoA | Slight | Slight | Slight | Fair | Slight | Slight | Fair | Slight | Poor |
| Hip abduction | N | 24 | 22 | 19 | 21 | 19 | 17 | 23 | 19 | 17 |
| κ | 0.020 | -0.320 | -0.009 | 0.000 | -0.404 | 0.150 | 0.031 | 0.114 | -0.248 |
| LoA | Slight | Poor | Poor | Slight | Poor | Slight | Slight | Slight | Poor |
| Hip adduction | N | 24 | 22 | 19 | 21 | 19 | 17 | 23 | 19 | 17 |
| κ | 0.091 | -0.174 | 0.055 | -0.055 | 0.486 | 0.042 | 0.038 | -0.218 | 0.256 |
| LoA | Slight | Poor | Slight | Poor | Mod. | Slight | Slight | Poor | Fair |
| κ = kappa value, LoA = level of agreement, Mod. = Moderate, Subst. = substantial, note: the level of agreements classified according to the Viera et al 34: poor (< 0.00), slight (0.00 – 0.20), fair (0.21 – 0.40), moderate (0.41 – 0.60), substantial (0.61 – 0.80), almost perfect (> 0.80) | | | | | | | | | | |
